# Supplementary material
Source: PubMed Central journal article supplement (PMC6440231)
Supplement: jamaophthalmol-137-288-s001.pdf [file jamaophthalmol-137-288-s001.pdf]

## Supplementary Online Content

Keel S, Wu J, Lee PY, Scheetz J, He M. Visualizing deep learning models for the detection of referable diabetic retinopathy and glaucoma. *JAMA Ophthalmol*. Published online December 20, 2018. doi:10.1001/jamaophthalmol.2018.6035

**eFigure 1.** Visualization of GON False-Positive Examples

**eFigure 2.** Visualization of DR False-Positive Examples

This supplementary material has been provided by the authors to give readers additional information about their work.

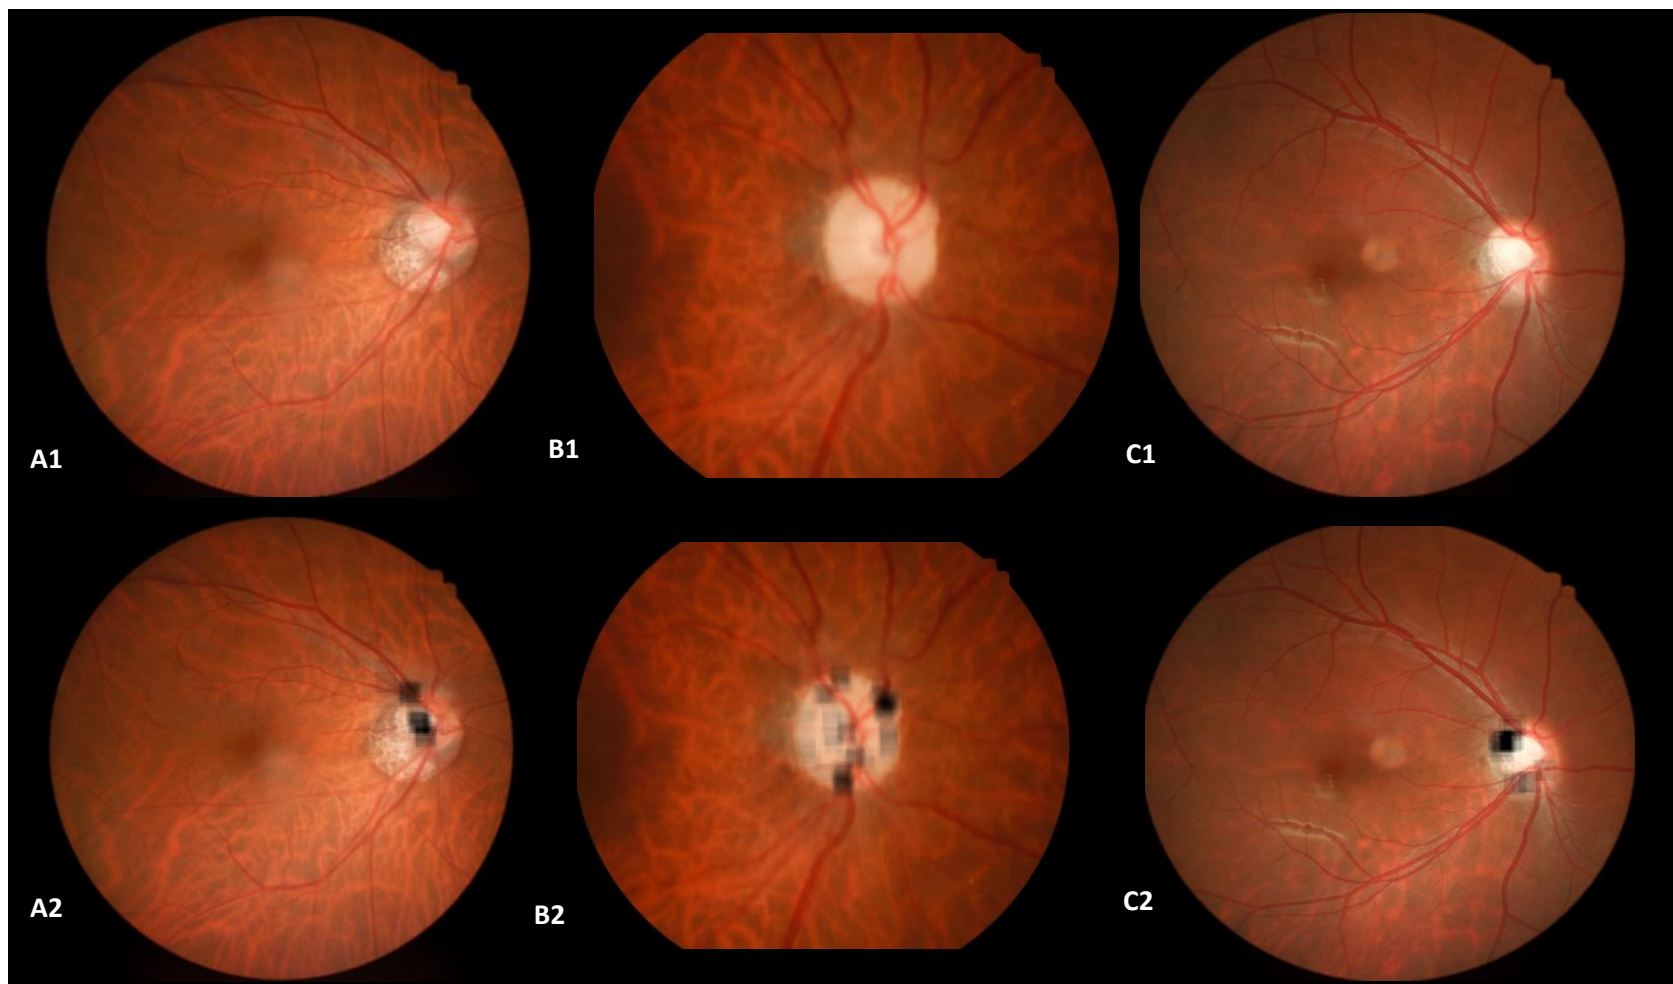

**eFigure 1.** Visualization of GON False-Positive Examples. A1, B1 & C1 show original images without heat-map. Image A2 shows heatmap predominantly visualizing traditional areas of glaucomatous loss (superior rim thinning) and parts of the superior RNFL. Image B2 heatmap

shows predominantly the superior and inferior rim being visualized and non-traditional areas of the ONH. Image C2 heatmap shows the superior and inferior neuro-retinal rim being visualized predominantly.

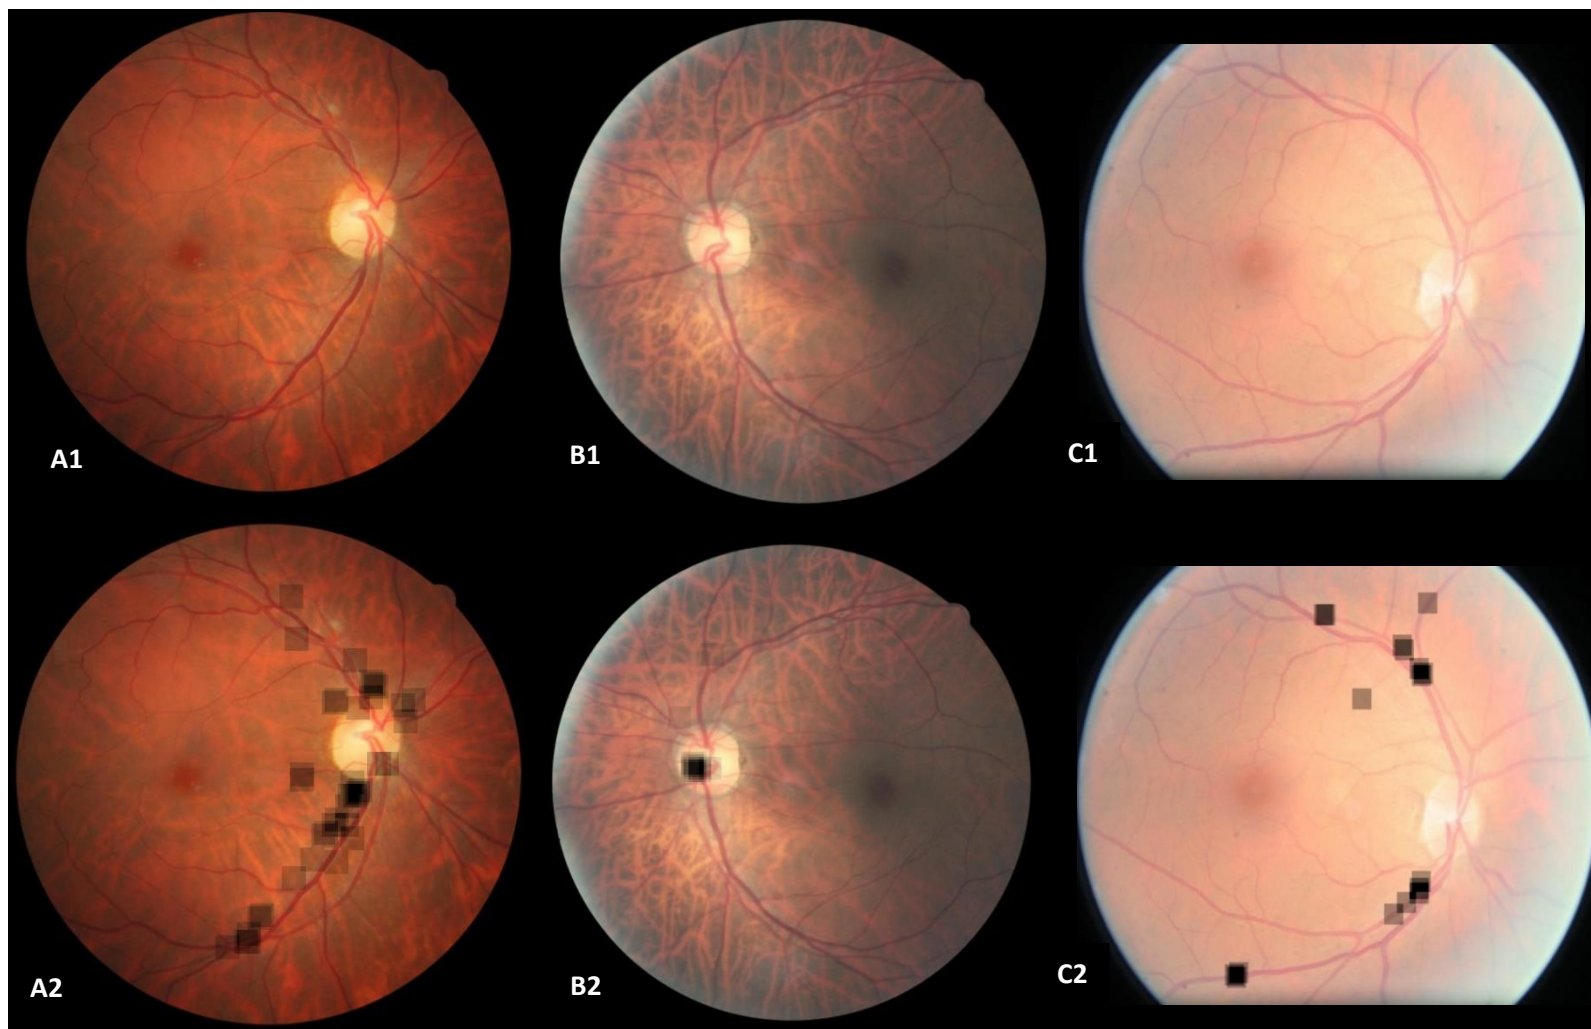

**eFigure 2.** Visualization of DR False-Positive Examples. Image A1, B1 & C1 show original images without heat-map. A2 Shows heatmap predominately visualizing retinal vessels and non-traditional areas (ONH). B2 Shows heatmap visualizing non-traditional areas only (ONH) and C2 heatmap shows predominately the superior and inferior arcades being visualized.
